# Supplementary material
Source: Springer Nature journal article supplement (https://www.springermedizin.de/resource/supplementary/12885_2008_1493_MOESM1_ESM.pdf/9472152)

**A****LEF-1**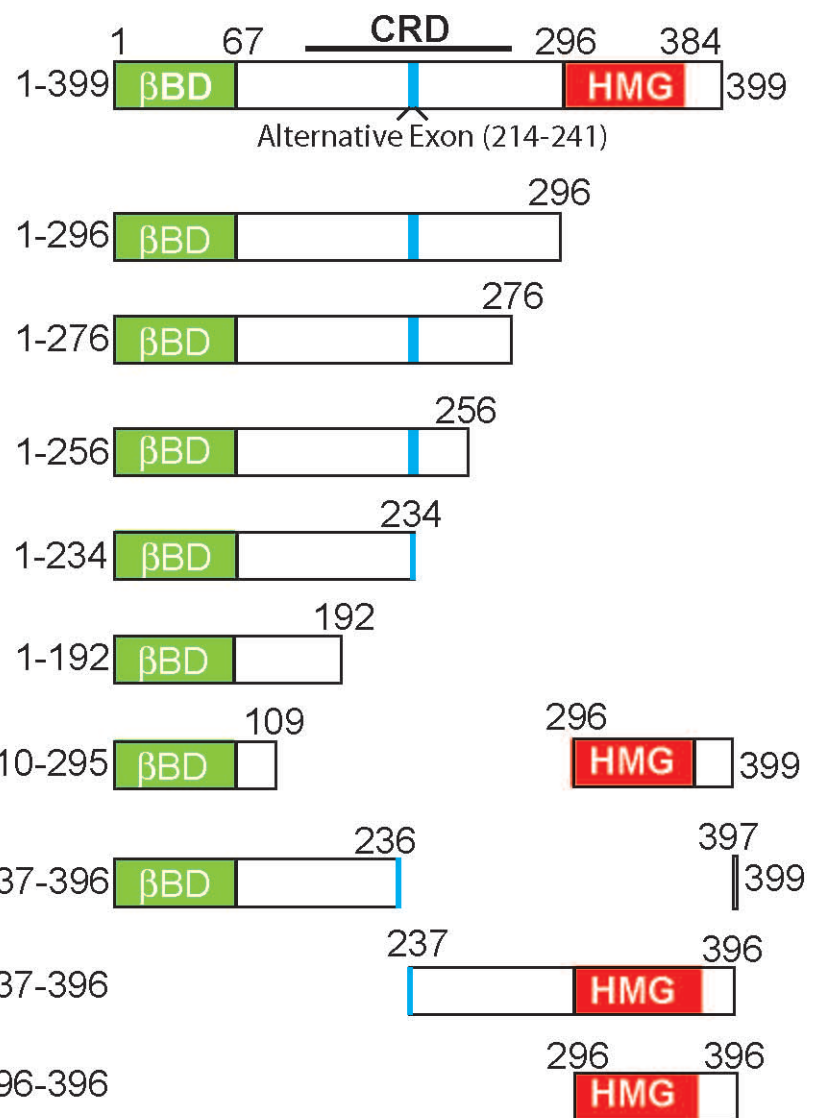**B****Groucho/TLE**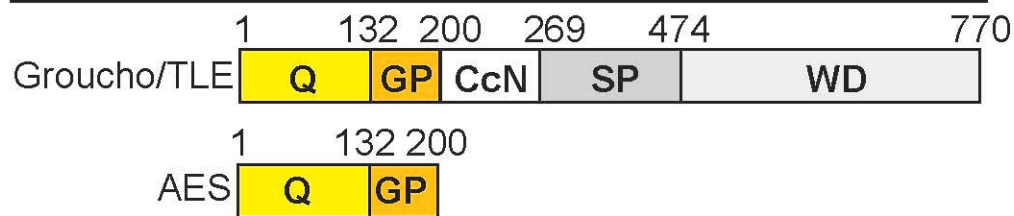**C****APC**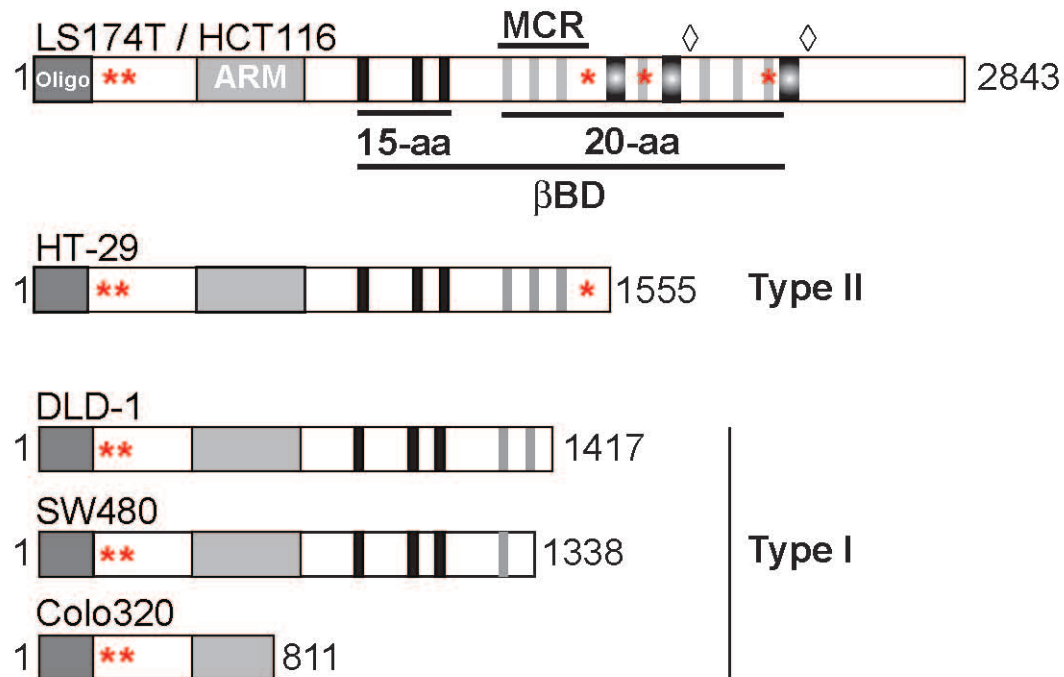

Supplement: MOESM1 [file 9472152]
